# Supplementary material for: Characteristic-Grouped Adiposity Indicators for Identifying Metabolic Syndrome in Adolescents: Develop and Valid Risk Screening Tools Using Dual Population
Source: Nutrients. 2020 Oct 16;12(10):3165. doi: 10.3390/nu12103165 (PMC7602786; doi:10.3390/nu12103165)
Supplement: Supplementary file 1 [file nutrients-12-03165-s001.pdf]

**Table S1.** Criteria of metabolic syndrome (MetS) and its abnormal components (AC) defined by IDF and JIS-Adult.

| MetS components.                             | Central obesity                                             | High blood pressure                                          | Low HDL-C                                | Increased triglyceride | Elevated fasting glucose                             | Diagnostic criteria of MetS          |
|----------------------------------------------|-------------------------------------------------------------|--------------------------------------------------------------|------------------------------------------|------------------------|------------------------------------------------------|--------------------------------------|
| <b>IDF-Adolescent [32]</b>                   |                                                             |                                                              |                                          |                        |                                                      |                                      |
| <b>10-15 years</b>                           | WC ≥90 percentile (or adult cutoff if lower) <sup>1,2</sup> | SBP ≥130 / DBP ≥85 mmHg (or antihypertensive drug treatment) | <40 mg/dL                                | ≥150 mg/dL             | ≥100 mg/dL (or previously diagnosed type 2 diabetes) | <b>Central obesity + 2 other ACs</b> |
| <b>16-18 years</b>                           | WC ≥90 percentile (or adult cutoff if lower) <sup>1,2</sup> | SBP ≥130 / DBP ≥85 mmHg (or antihypertensive drug treatment) | <40 mg/dL in males, <50 mg/dL in females | ≥150 mg/dL             | ≥100 mg/dL (or previously diagnosed type 2 diabetes) | <b>Central obesity + 2 other ACs</b> |
| <b>JIS-Adult (for Asians ≥18 years) [20]</b> | WC ≥90 cm in males, WC ≥80 cm in females <sup>3</sup>       | SBP ≥130 / DBP ≥85 mmHg (or antihypertensive drug treatment) | <40 mg/dL in males, <50 mg/dL in females | ≥150 mg/dL             | ≥100 mg/dL (or previously diagnosed type 2 diabetes) | <b>Any 3 or more ACs</b>             |
| <b>Difference in definition<sup>4</sup></b>  | <b>No</b>                                                   | <b>No</b>                                                    | <b>Yes</b>                               | <b>No</b>              | <b>No</b>                                            | <b>Yes</b>                           |

**Abbreviations:** IDF-Adolescent, International Diabetes Federation definition of MetS for adolescents; JIS-Adult, Joint Interim Statement of MetS for adults; WC, waist circumference; HDL-C, high-density lipoprotein cholesterol; SBP, systolic blood pressure; DBP, diastolic blood pressure. <sup>1</sup>The 90 percentiles of WC in this nationwide data were both higher than that of Asian adult cutoff points, therefore, the adult cutoff points (i.e., WC ≥90 cm in males and ≥80 cm in females) were applied. <sup>2</sup>Central obesity can be assumed if BMI is >30 kg/m<sup>2</sup>, and WC does not need to be considered. <sup>3</sup>The recommended WC thresholds of abdominal obesity for Asian adults (i.e., WC ≥90 cm in males and ≥80 cm in females) were applied. <sup>4</sup>This denotes whether there were differences in the diagnosis of MetS and its components across 3 criteria.
